# Supplementary material
Source: MDPI journal article supplement (https://www.mdpi.com/2073-4441/15/18/3249)
Supplement: s1 [file s1]

**Table S1:** Parameters, their description, initial, maximum, and minimum values

| Parameter name | Description                                                      | Initial value | Minimum            | Maximum | Parameter group |
|----------------|------------------------------------------------------------------|---------------|--------------------|---------|-----------------|
| cn_rca         | Curve number A for row crops (-)                                 | 1             | 0.1                | 100     | cn              |
| cn_rcb         | Curve number B for row crops (-)                                 | 1             | 0.1                | 100     | cn              |
| cn_rcc         | Curve number C for row crops (-)                                 | 1             | 0.1                | 100     | cn              |
| cn_rcd         | Curve number D for row crops (-)                                 | 1             | 0.1                | 100     | cn              |
| cn_wooda       | Curve number A for woodland (-)                                  | 1             | 0.1                | 100     | cn              |
| cn_woodb       | Curve number B for woodland (-)                                  | 1             | 0.1                | 100     | cn              |
| cn_woodc       | Curve number C for woodland (-)                                  | 1             | 0.1                | 100     | cn              |
| cn_woodd       | Curve number D for woodland (-)                                  | 1             | 0.1                | 100     | cn              |
| esco           | Soil evaporation compensation factor (-)                         | 0.38          | 0.1                | 1       | hydro           |
| perco          | Percolation coefficient (-)                                      | 0.94          | 0.1                | 1       | hydro           |
| wt_depth       | Initial water table depth (m)                                    | 2.88          | 0.5                | 25      | gwflow          |
| rech_del       | Recharge delay (day)                                             | 108.91        | 1                  | 1000    | gwflow          |
| Kaqu19         | Hydraulic conductivity for zone 19 (m/day)                       | 11.03         | $1 \times 10^{-6}$ | 300     | gwflow          |
| Kaqu24         | Hydraulic conductivity for zone 24 (m/day)                       | 3.71          | $1 \times 10^{-6}$ | 300     | gwflow          |
| Syaqu19        | Specific yield for zone 19 (-)                                   | 0.49          | 0.05               | 0.6     | gwflow          |
| Syaqu24        | Specific yield for zone 24 (-)                                   | 0.03          | 0                  | 0.6     | gwflow          |
| bed_k          | Hydraulic conductivity of riverbed (m/day)                       | 0.03          | $1 \times 10^{-5}$ | 1       | gwflow          |
| bed_thick      | Streambed Thickness (m)                                          | 1.01          | 0.2                | 5       | gwflow          |
| awc            | Available water capacity (mm H <sub>2</sub> O/mm soil)           | 0.44          | 0.01               | 1       | soils           |
| K_soil         | Soil saturated hydraulic conductivity (mm/hr)                    | 300           | $1 \times 10^{-3}$ | 500     | soils           |
| surq_lag       | Surface runoff lag coefficient                                   | 0             | $1 \times 10^{-3}$ | 70      | parameters      |
| OVN1           | Manning's "n" value for overland flow – conventional tillage (-) | 0.8           | $1 \times 10^{-3}$ | 0.8     | Ovn             |
| OVN4           | Manning's "n" value for overland flow – medium range forest (-)  | 0.8           | $1 \times 10^{-3}$ | 0.8     | Ovn             |
| n              | Channel Manning coefficient (-)                                  | 0.09          | $1 \times 10^{-3}$ | 0.09    | hyd             |
| k              | Channel bottom conductivity (mm/day)                             | 4.58          | $1 \times 10^{-5}$ | 70      | hyd             |
| flo_min        | Minimum aquifer storage to allow return flow (m)                 | 5             | 0.1                | 100     | aquifer         |
| alpha          | Baseflow alpha factor                                            | 0.09          | $1 \times 10^{-4}$ | 0.9     | aquifer         |
| cn2            | Curve number (-)                                                 | 10            | -30                | 100     | cn              |

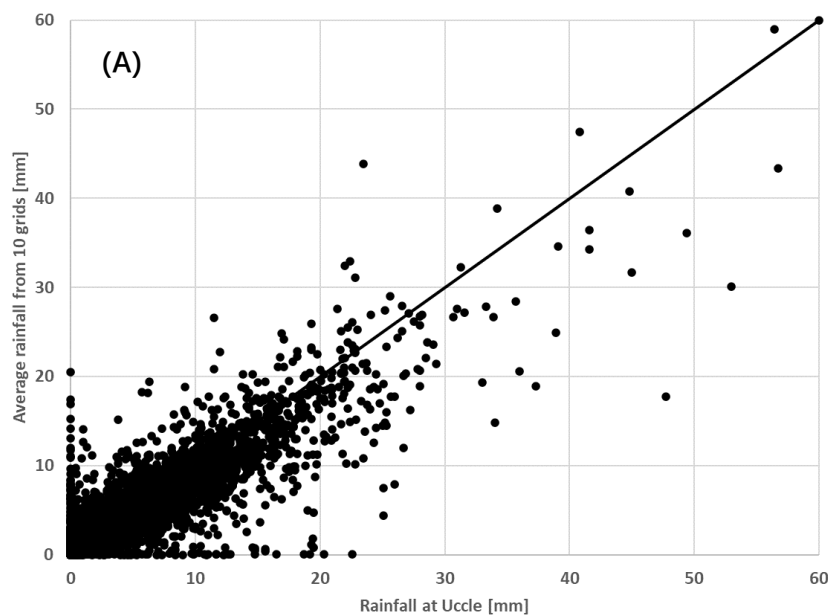

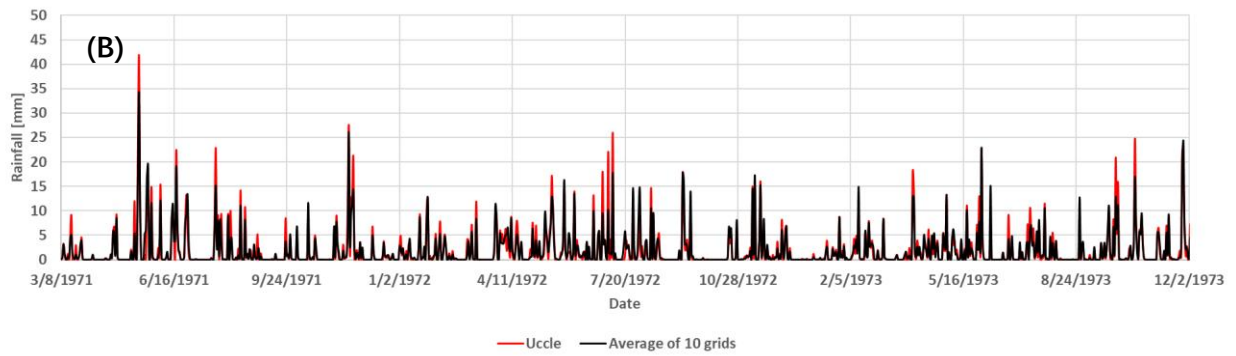

| Location                              | Uccle | 1    | 2    | 3    | 4    | 5    | 6    | 7    | 8    | 9    | 10   |
|---------------------------------------|-------|------|------|------|------|------|------|------|------|------|------|
| Long-term Average daily rainfall (mm) | 2.29  | 2.15 | 2.12 | 2.15 | 2.09 | 2.23 | 2.21 | 2.09 | 2.41 | 2.20 | 2.13 |

**Figure S1:** The comparison of average daily rainfall from 10 grid points and Uccle station (A and B). The long-term average rainfall for the 10 locations and Uccle station is also shown in the table.

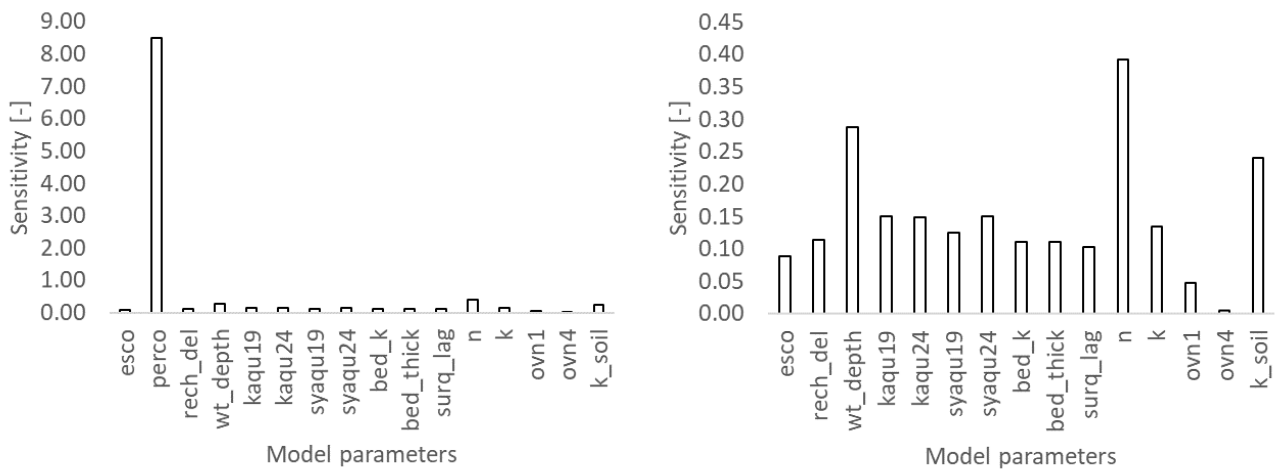

**Figure S2:** The sensitivity of model parameters where perco (left) is included in the plot. The sensitivity of other parameters (especially groundwater-related) is seen (right) when perco is removed from the plot.

**Table S2:** The calibrated model parameter values for the SWAT+gwflow and the standalone SWAT+ model

| SWAT+gwflow calibrated parameters |                 | SWAT+ parameters |                 |
|-----------------------------------|-----------------|------------------|-----------------|
| Parameter                         | Estimated value | Parameter        | Estimated value |
| esco                              | 0.2775          | perco            | 0.737           |
| perco                             | 0.9539          | awc              | 0.122           |
| wt_depth                          | 3.3745          | esco             | 0.312           |
| rech_del                          | 74.4945         | flo_min          | 87.871          |
| kaqu19                            | 9.6382          | alpha            | 0.001           |
| kaqu24                            | 3.0785          | cn2              | -10.795         |
| syaqu19                           | 0.4174          |                  |                 |

|           |          |
|-----------|----------|
| syaqu24   | 0.0262   |
| bed_k     | 0.0003   |
| bed_thick | 0.4172   |
| surq_lag  | 0.0044   |
| k_soil    | 332.0680 |
| ovn1      | 0.8000   |
| ovn4      | 0.8000   |
| n         | 0.0899   |
| k         | 5.2877   |

**Table S3:** The final aquifer parameters used for the simulation (calibrated for zone 19 and 24 and uncalibrated for the rest)

| Zone | K (m/day)             | Sy (-) |
|------|-----------------------|--------|
| 1    | $3 \times 10^{-5}$    | 0.200  |
| 2    | 5.79                  | 0.123  |
| 3    | $3 \times 10^{-5}$    | 0.200  |
| 4    | 0.27                  | 0.200  |
| 5    | 1.34                  | 0.200  |
| 6    | $3 \times 10^{-5}$    | 0.200  |
| 7    | $3 \times 10^{-5}$    | 0.200  |
| 8    | $3 \times 10^{-5}$    | 0.200  |
| 9    | 0.77                  | 0.071  |
| 10   | $3 \times 10^{-5}$    | 0.200  |
| 11   | 10.67                 | 0.200  |
| 12   | $8.48 \times 10^{-2}$ | 0.200  |
| 13   | $8.48 \times 10^{-3}$ | 0.200  |
| 14   | $1.40 \times 10^{-4}$ | 0.200  |
| 15   | 3.79                  | 0.200  |
| 16   | 3.79                  | 0.200  |
| 17   | 3.79                  | 0.200  |
| 18   | 25.60                 | 0.200  |
| 19   | 9.64                  | 0.417  |
| 20   | $1.40 \times 10^{-4}$ | 0.200  |
| 21   | 25.60                 | 0.200  |
| 22   | $8.48 \times 10^{-2}$ | 0.200  |
| 23   | 1.34333               | 0.200  |
| 24   | 3.08                  | 0.026  |

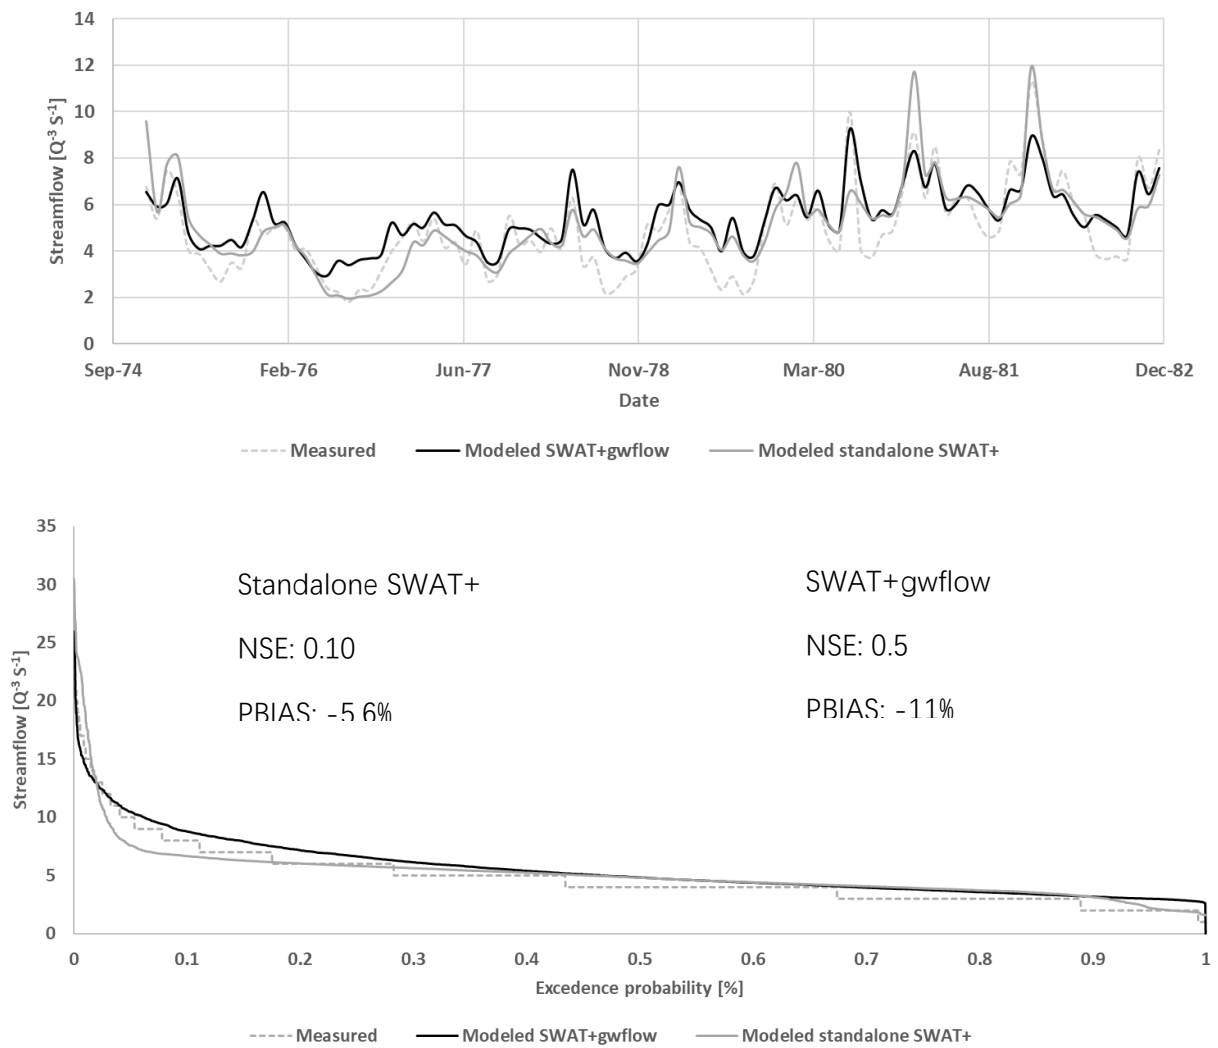

**Figure S3:** The comparison between measured and simulated monthly streamflow (top) and flow duration curve for daily time step (bottom). All plots are for the first validation period for the catchment outlet (1975 to 1982).

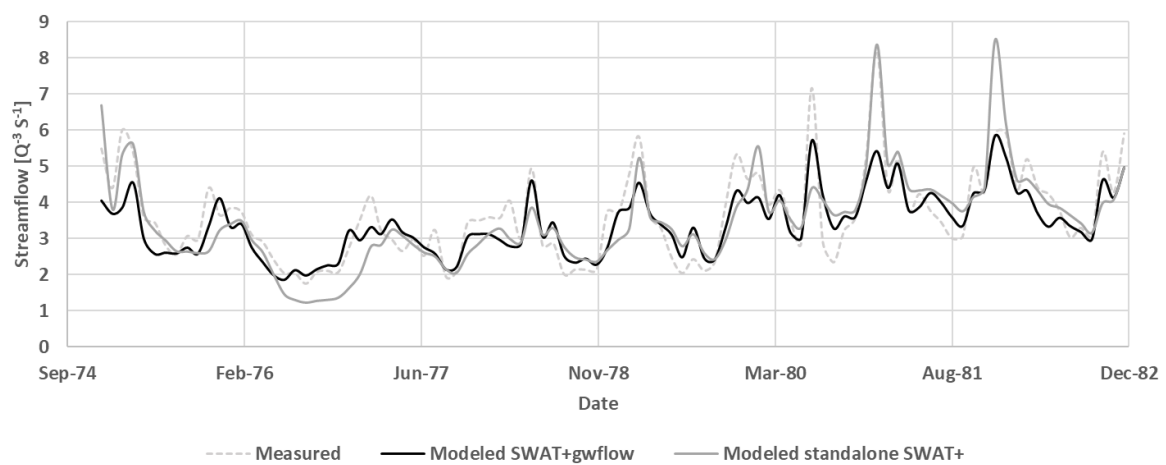

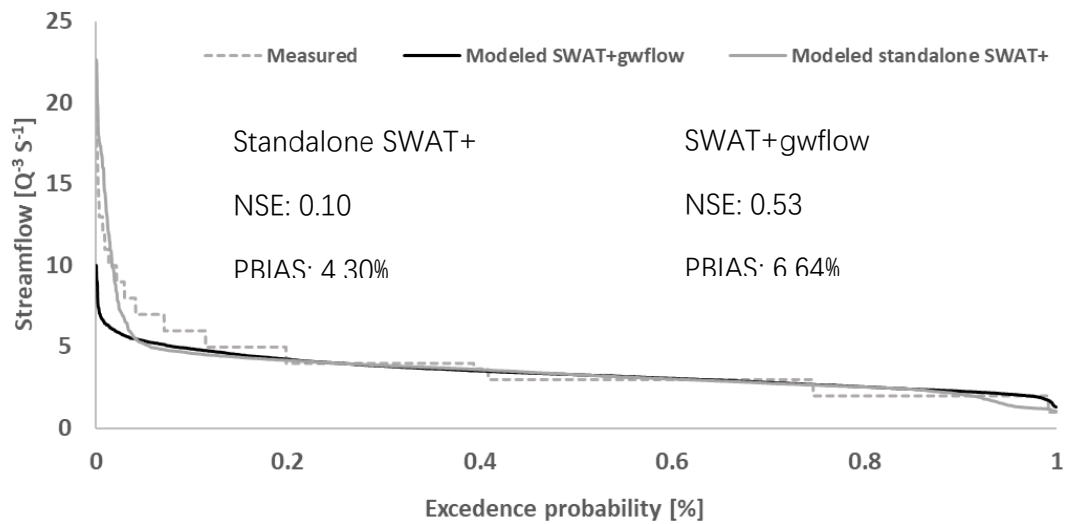

**Figure S4:** The comparison between measured and simulated monthly streamflow (top) and flow duration curve for daily time step (bottom). All plots are for the first validation period for the Sint-Joris-Weert gauging station (1975 to 1982).
